# Supplementary material for: Simple Fluorescence Sensing Approach for Selective Detection of Fe3+ Ions: Live-Cell Imaging and Logic Gate Functioning
Source: PubMed Central journal article supplement — ACS Omega. 2022 Sep 12;7(37):33248–57. doi: 10.1021/acsomega.2c03718 (PMC9494683; doi:10.1021/acsomega.2c03718), 2022-09-12
Supplement: ao2c03718_si_001.pdf [file ao2c03718_si_001.pdf]

# **Simple Fluorescence Sensing Approach for Selective Detection of Fe<sup>3+</sup> Ion: Live Cell Imaging and Logic Gate Functioning**

Puthiyavalappil Rasin<sup>a</sup>, Vipin Manakkadan<sup>a</sup>, Vishnunarayanan Namboothiri Vadakkedathu  
Palakkeezhillam<sup>a</sup>, Jebiti Haribabu<sup>b</sup>, Cesar Echeverria<sup>b</sup> and Anandaram Sreekanth<sup>a\*</sup>

Department of Chemistry, National Institute of Technology-Tiruchirappalli, Tamil Nadu,  
India-620015

<sup>b</sup> Facultad de Medicina, Universidad de Atacama, Los Carreras 1579, 1532502, Copiapo, Chile

\* Corresponding Author: E-mail: [sreekanth@nitt.edu](mailto:sreekanth@nitt.edu); Tel: +91 431 2503642 ; Fax: +91 431  
2500133

## List of Contents

1. Synthetic Procedure and Spectral Data of Sensor **APSB**
2.  $^1\text{H}$  NMR and  $^{13}\text{C}$  NMR Spectra of **APSB**
3. HR-MS spectra of **APSB** and its  $\text{Fe}^{3+}$  Complex
4. Linear Response of Fluorescence Titration of **APSB**
5. Solvatochromic Study of **APSB**
6. Time-dependence study
7. Effect of pH on receptor **APSB**
8. UV/vis Spectral Responses of **APSB**
9. Job's Plot for 1:1 Complexation of **APSB** and  $\text{Fe}^{3+}$
10. Cyclic Voltammetry of **APSB**
11. Proposed Optimized Geometries of **APSB** and its  $\text{Fe}^{3+}$  Complex

## 1. Synthetic Procedure and Spectral Data of Sensor APSB

A solution of pyrene-1- carboxaldehyde (0.230g, 1mmol) in hot ethanol (25 mL), was added dropwise to a solution of 2-amino anthracene (0.193g, 1mmol) in ethanol (5 mL), 4-5 drops of glacial acetic acid was added to the reaction. Then the reaction mixture was further refluxed for 8 h. Finally, the precipitate formed was filtered, washed well with cold ethanol, and dried. Yield 92%; IR (ATR)  $\nu_{\text{max}}/\text{cm}^{-1}$  3037,1577.  $^1\text{H}$  NMR (500 MHz,  $\text{CDCl}_3$ )  $\delta$  9.72 (s, 1H), 8.52 (s, 1H), 8.50 (s, 2H), 8.37 (d,  $J = 9.2$  Hz, 2H), 8.34 (d,  $J = 9.6$  Hz, 3H), 8.32 – 8.29 (m, 6H), 8.15 (d,  $J = 4.8$  Hz, 2H), 8.3 (s, 1H), 7.71 (d,  $J = 9.1$  Hz, 1H) ppm.

$^{13}\text{C}$  NMR (126 MHz)  $\delta$  193.08, 158.64, 135.58, 132.22, 131.40, 130.86, 130.74, 129.71, 129.15, 128.27, 128.02, 127.53, 127.23, 127.07, 126.86, 126.59, 126.28, 126.27, 126.26, 126.00, 125.65, 125.35, 125.14, 124.58, 123.85, 123.82, 123.06, 122.63, 122.51, 120.04, 117.34 ppm. (HR-MS)  $m/z$ : calcd for  $\text{C}_{31}\text{H}_{19}\text{N}$ : 405.15, found: 406.04  $[\text{M}+\text{H}]^+$

## 2. $^1\text{H}$ NMR and $^{13}\text{C}$ NMR Spectra of APSB

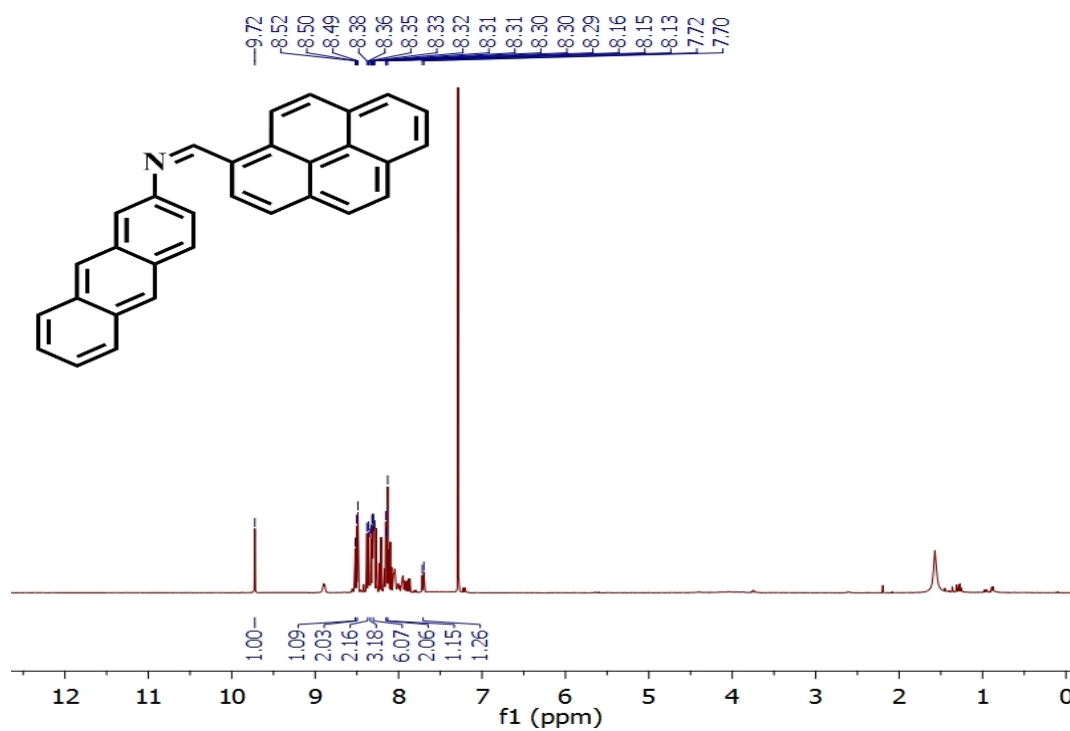

Figure S1:  $^1\text{H}$  NMR spectra of APSB

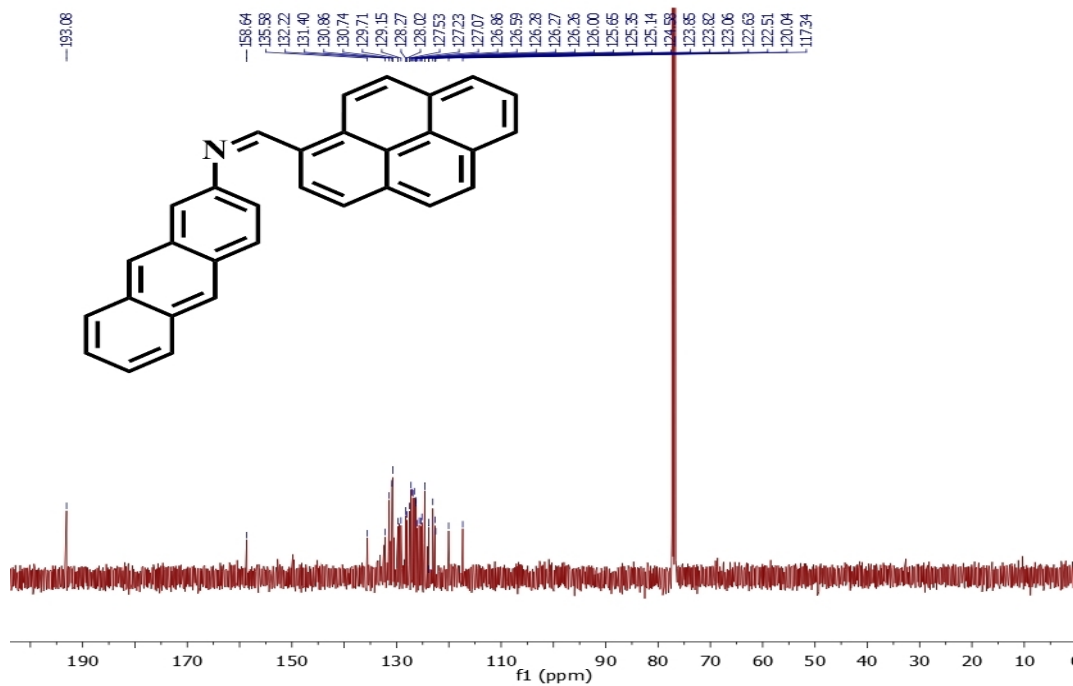

Figure S2:  $^{13}\text{C}$  NMR spectra of APSB

### 3. HR-MS spectra of APSB and its Fe<sup>3+</sup> Complex

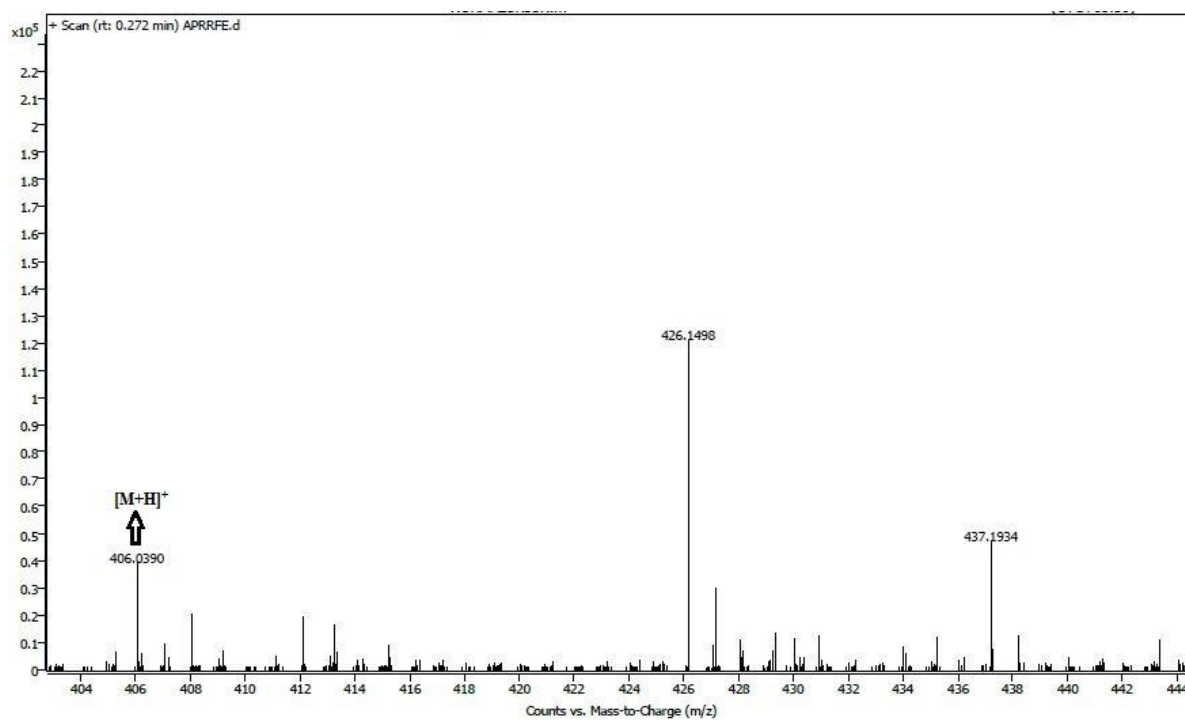

(A)

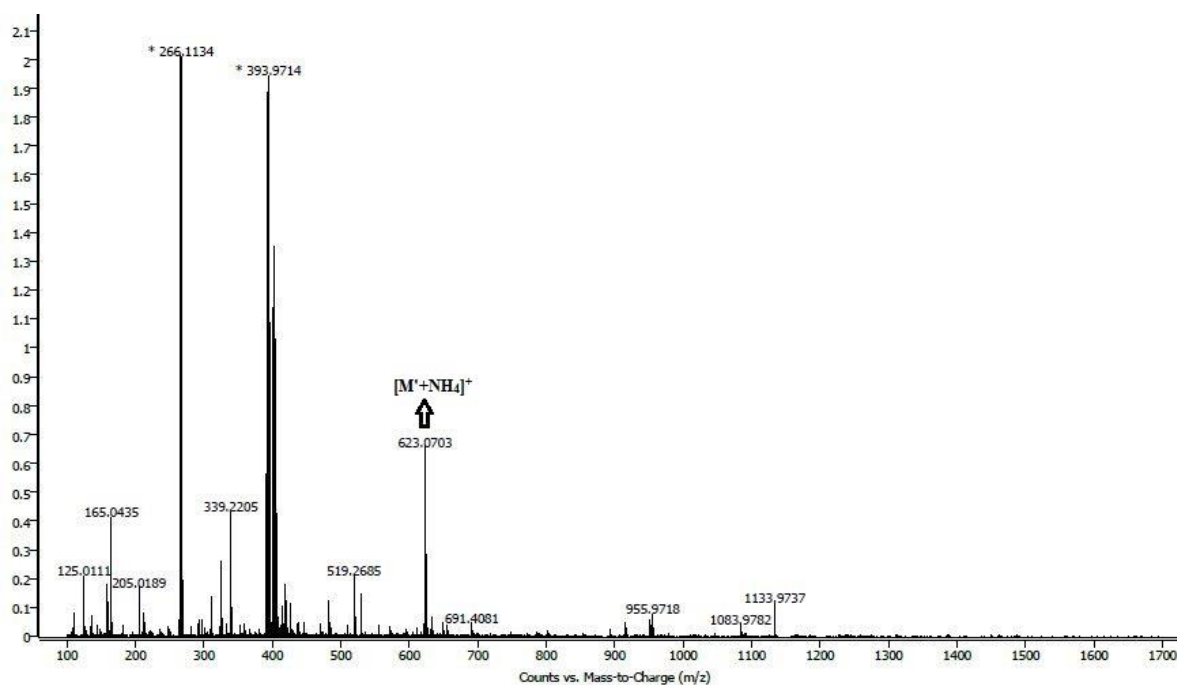

Where M' = APSB-Fe<sup>3+</sup>

(B)

**Figure S3:** HR-MS spectra of chemosensor APSB (A) and APSB-Fe<sup>3+</sup> complex (B)

#### 4. Linear Response of Fluorescence Titration of APSB

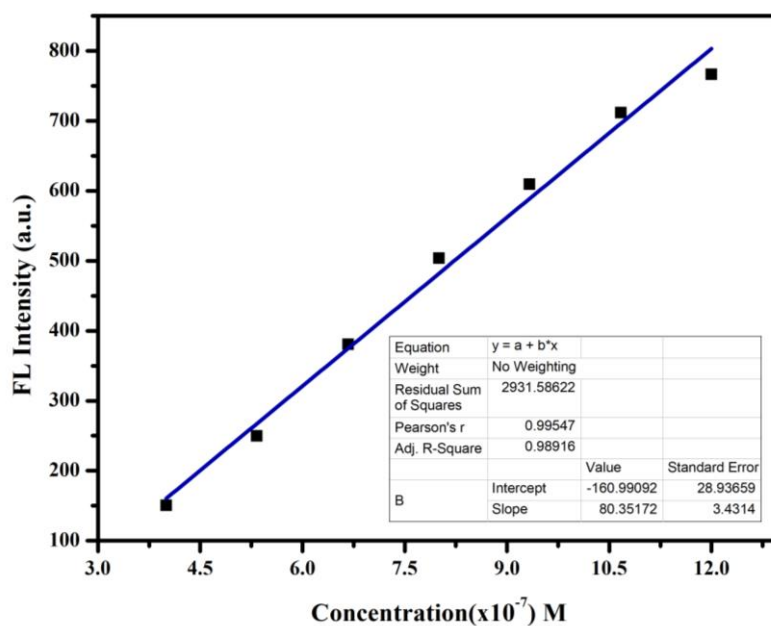

**Figure S4:** Linear response of fluorescence titration of APSB ( $1 \times 10^{-5}$  M) in the presence of the increasing amount of  $\text{Fe}^{3+}$  (0-1.5 Equiv.) in  $\text{CH}_3\text{CN}/\text{H}_2\text{O}$  (95/5 v/v), medium,  $\lambda_{\text{em}} = 520$  nm

#### 5. Solvatochromic study of APSB

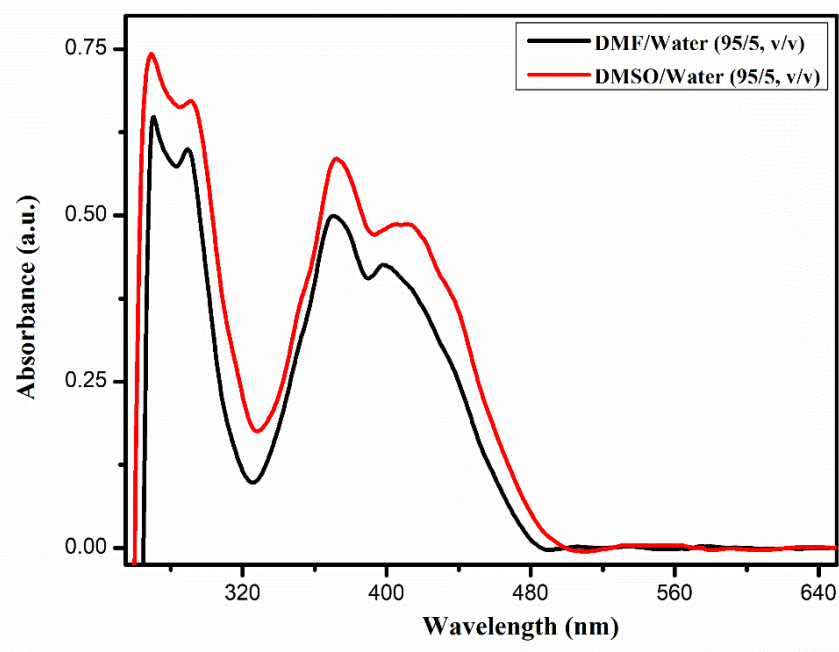

**Figure S5:** Solvatochromic studies of APSB in DMF and DMSO solvents and water mixture (solvent/ $\text{H}_2\text{O}$ , 95/5 v/v) medium.

## 6. Time-dependence study

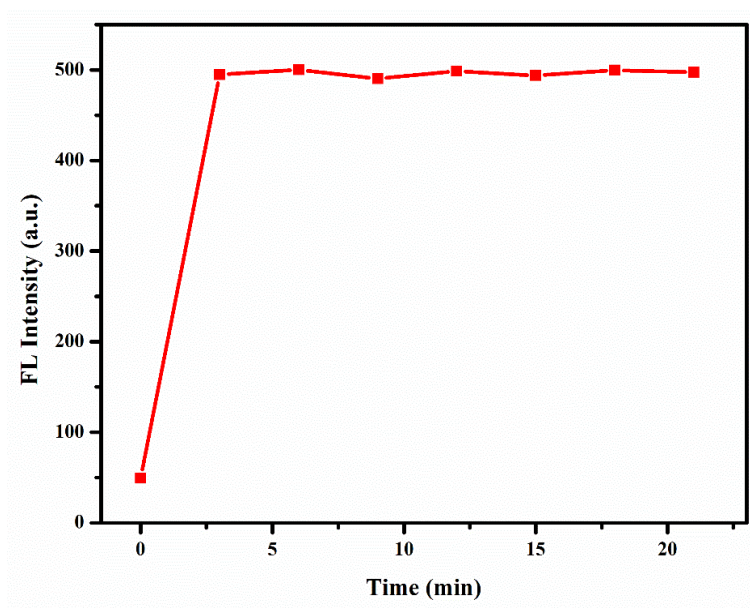

**Figure S6:** Fluorescent Intensity of APSB-Fe<sup>3+</sup> complex at different time intervals ( $\lambda_{em}=520$  nm,  $\lambda_{ex}=413$  nm)

## 7. Effect of pH on receptor APSB

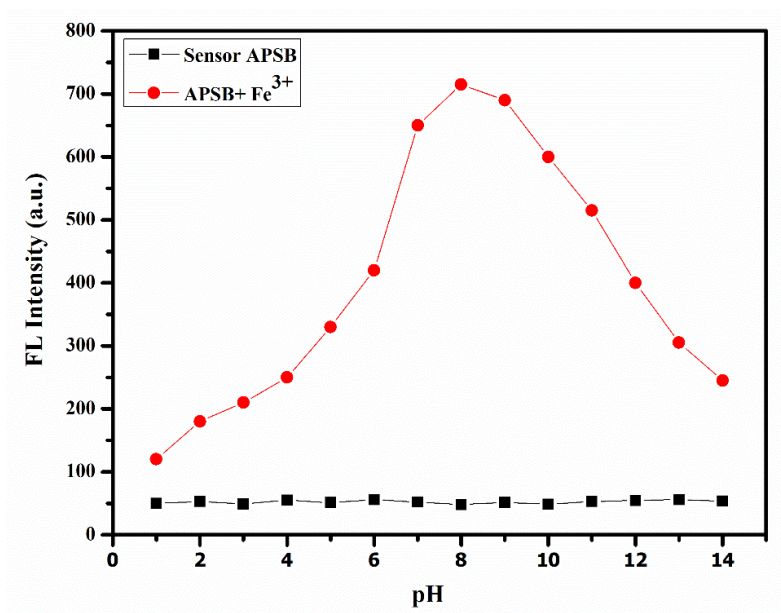

**Figure S7:** Fluorescence intensity (520 nm) of free receptor APSB (Black) ( $1 \times 10^{-5}$  M) and after the addition of Fe<sup>3+</sup> ( $1 \times 10^{-3}$  M) (Red circles) in DMSO/Water (95/5, v/v) solutions as a function of pH.

## 8. UV/vis Spectral Responses of APSB

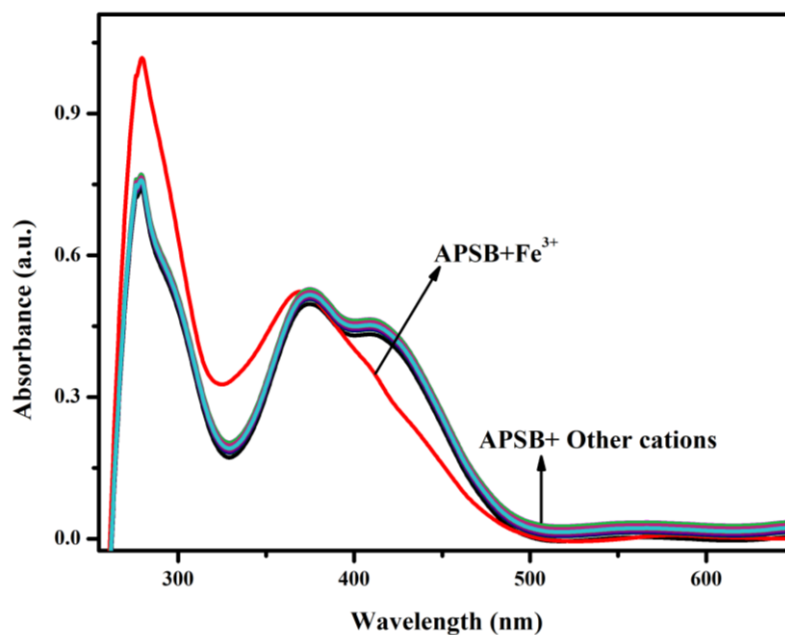

**Figure S8:** UV/vis absorption spectra of APSB ( $1 \times 10^{-5}$  M) in DMSO/H<sub>2</sub>O (95/5 v/v) medium with various metal ions ( $1 \times 10^{-3}$  M,  $\lambda_{\text{abs}} = 290$  and  $375$  nm).

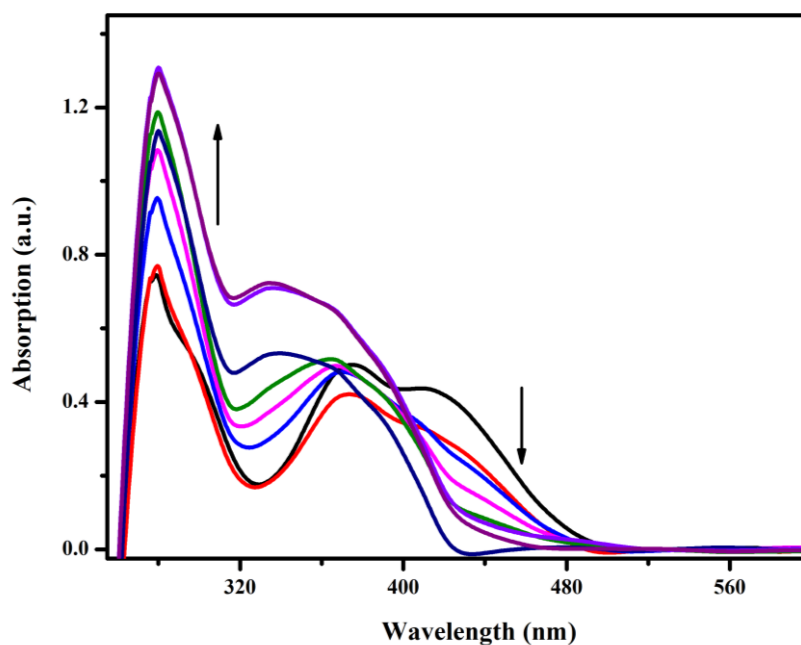

**Figure S9:** UV/vis absorption spectra of APSB ( $1 \times 10^{-5}$  M) with the increasing amount of Fe<sup>3+</sup> (0–1.5 Equiv.) in DMSO/H<sub>2</sub>O (95/5 v/v) medium.



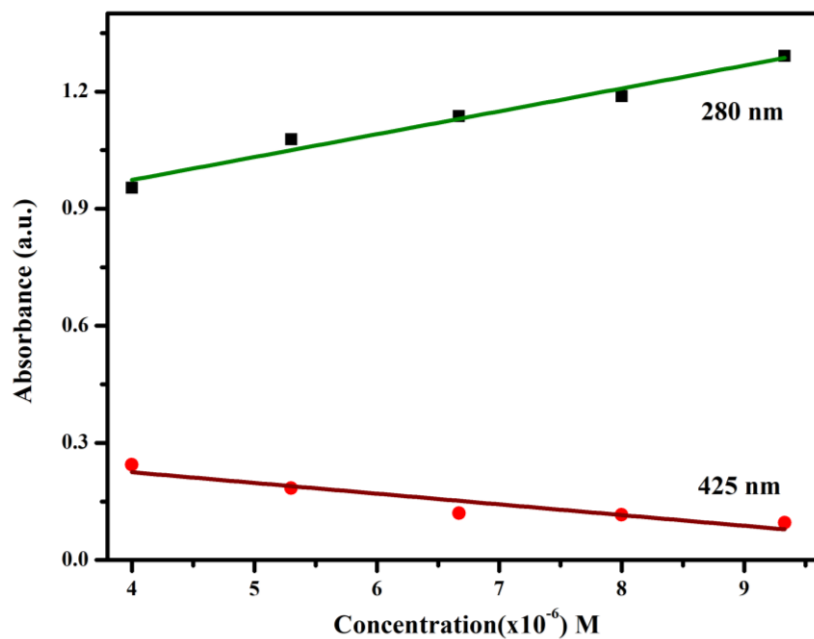

**Figure S10:** Linear response of UV/vis titration of APSB ( $1 \times 10^{-5}$  M) in the presence of the increasing amount of  $\text{Fe}^{3+}$  (0–1.5 Equiv.) in DMSO/H<sub>2</sub>O (95/5 v/v) medium

### 9. Job's Plot for 1:1 Complexation of APSB and $\text{Fe}^{3+}$

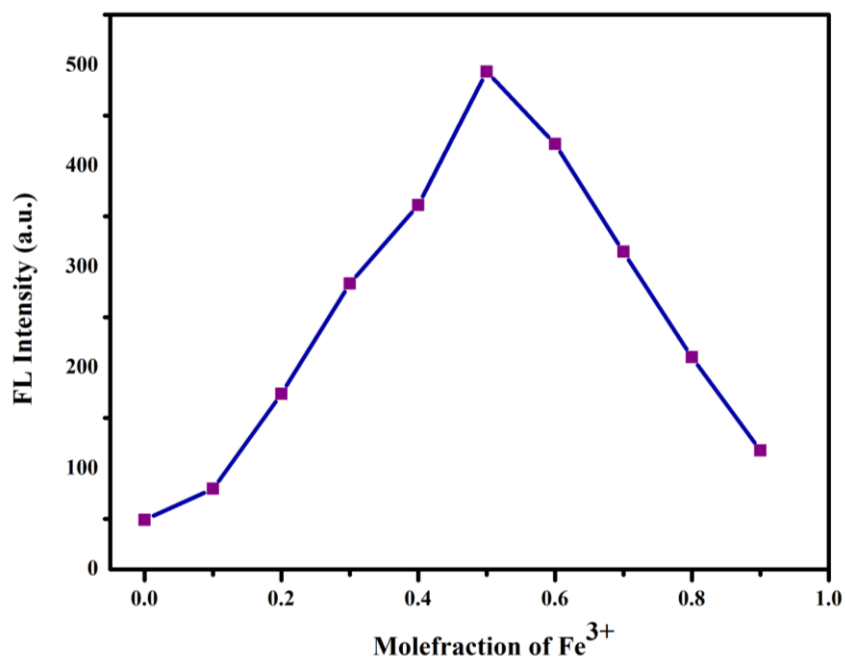

**Figure S11:** Job's plot for 1:1 complexation of APSB and  $\text{Fe}^{3+}$  ( $\lambda_{\text{em}} = 520$  nm) in DMSO/H<sub>2</sub>O (95/5 v/v) medium.

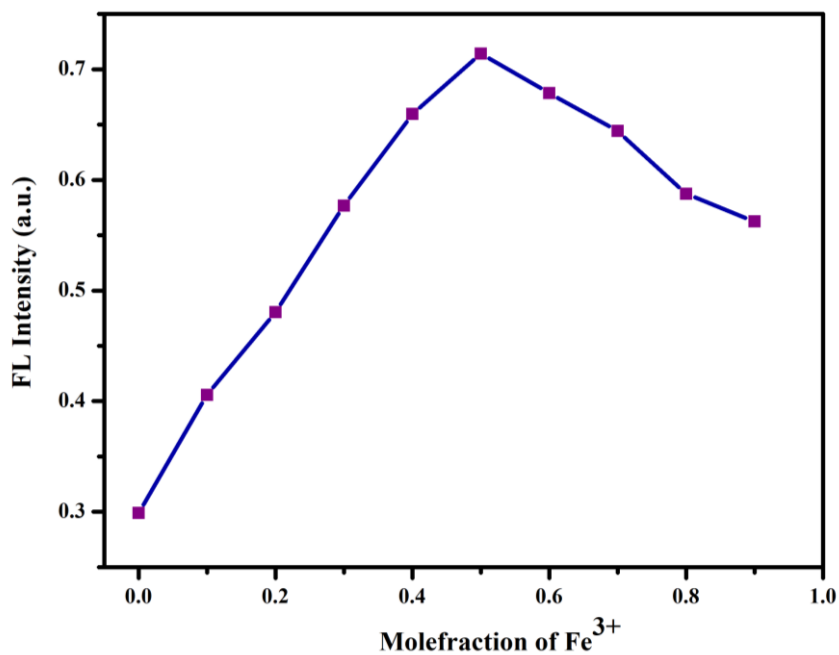

**Figure S12:** Job's plot for 1:1 complexation of APSB and Fe<sup>3+</sup> ( $\lambda_{\text{abs}} = 413 \text{ nm}$ ) in DMSO/H<sub>2</sub>O (95/5 v/v) medium.

### 10. Cyclic Voltammetry of APSB

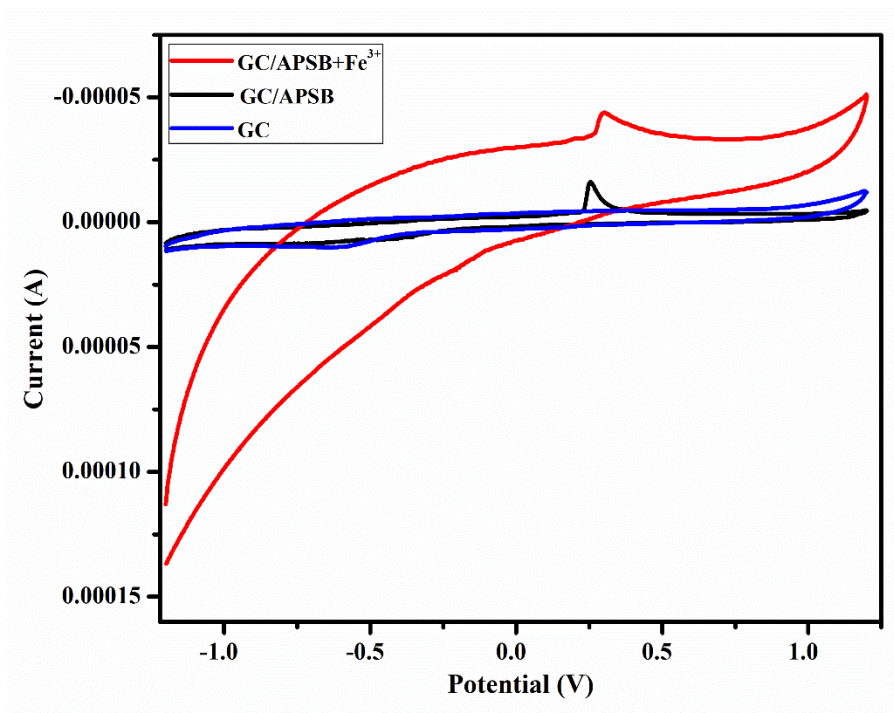

**Figure S13:** Cyclic voltammetry of APSB ( $1 \times 10^{-5} \text{ M}$ ) with Fe<sup>3+</sup> ( $1 \times 10^{-3} \text{ M}$ ) in PBS (7) potential range: -1.5 V up to 1.5 V,  $\nu = 0.1 \text{ V s}^{-1}$ .

## 11. Proposed Optimized Geometries of APSB and its Fe<sup>3+</sup> Complex

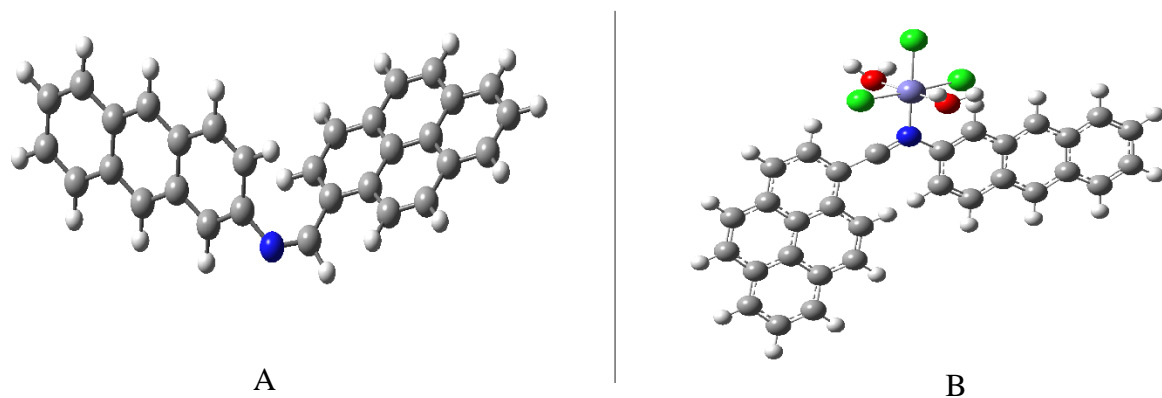

**Figure S14:** Proposed optimized geometries of APSB (A) and APSB with the Fe<sup>3+</sup> complex (B)
